# Supplementary material for: A comparison study to investigate the effect of the drug-loading site on its delivery efficacy using double hydrophilic block copolymer-based prodrugs
Source: Royal Society of Chemistry journal article supplement (doi:10.1039/c7tb00261k), 2017-01-01
Supplement: c7tb00261k1.pdf [file c7tb00261k1.pdf]

## **Supporting information**

*of*

### **A comparison study to investigate the effect of drug-conjugated site on its delivery efficacy using double hydrophilic block copolymers-based prodrugs**

Xufeng Zhou, Cong Chang, Yang Zhou, Lu Sun, Hua Xiang, Sijie Zhao,  
Liwei Ma, Guohua Zheng, Mingzhu Liu, and Hua Wei\*

**1. Table S1, S2, S3**

**2. Figure S1, S2, S3, S4, S5, S6**

**Table S1.** Summary of RAFT-synthesized P(HPMA)-*b*-P(NIPAAm-*st*-EGMA).

|                            | No | Time (min) | Conv. (%) by <sup>1</sup> H NMR | Real structure by <sup>1</sup> H NMR                                                            |
|----------------------------|----|------------|---------------------------------|-------------------------------------------------------------------------------------------------|
| NIPAAm:EGMA:               | 1  | 120        | 26.6                            | P(HPMA) <sub>36</sub> - <i>b</i> -                                                              |
| [P(HPMA) macro-CTA]:[AIBN] |    |            |                                 | P(EGMA <sub>11</sub> - <i>st</i> -NIPAAm <sub>123</sub> )                                       |
| = 462:38:1:1/3             |    |            |                                 |                                                                                                 |
| [M]=1.25M                  | 2  | 162        | 44.4                            | P(HPMA) <sub>36</sub> - <i>b</i> -<br>P(EGMA <sub>20</sub> - <i>st</i> -NIPAAm <sub>205</sub> ) |
| T=70 °C                    | 3  | 180        | 51.9                            | P(HPMA) <sub>36</sub> - <i>b</i> -<br>P(EGMA <sub>22</sub> - <i>st</i> -NIPAAm <sub>240</sub> ) |
| MeOH/1,4-dioxane           |    |            |                                 |                                                                                                 |

**Table S2.** Summary of RAFT-synthesized P(HPMA-*st*-EGMA)-*b*-P(NIPAAm).

|                  | No | Time (min) | Conv. (%) by <sup>1</sup> H NMR | Real structure by <sup>1</sup> H NMR                                                          |
|------------------|----|------------|---------------------------------|-----------------------------------------------------------------------------------------------|
| NIPAAm:          | 1  | 210        | 24.0                            | P(HPMA <sub>38</sub> - <i>co</i> -                                                            |
| [macro-CTA]      |    |            |                                 | EGMA <sub>19</sub> )- <i>b</i> -NIPAAm <sub>120</sub>                                         |
| : [AIBN]         | 2  | 240        | 36.0                            | P(HPMA <sub>38</sub> - <i>co</i> -                                                            |
| =500:1:1/3       |    |            |                                 | EGMA <sub>19</sub> )- <i>b</i> -NIPAAm <sub>180</sub>                                         |
| [M]=1.25M        | 3  | 260        | 44.4                            | P(HPMA <sub>38</sub> - <i>co</i> -                                                            |
| T=70°C           |    |            |                                 | EGMA <sub>19</sub> )- <i>b</i> -NIPAAm <sub>207</sub> )                                       |
| MeOH/1,4-dioxane | 4  | 265        | 51.9                            | P(HPMA <sub>38</sub> - <i>co</i> -<br>EGMA <sub>19</sub> )- <i>b</i> -NIPAAm <sub>212</sub> ) |

**Table S3.** Summary of cell uptake efficiency by semi-quantitative analysis of confocal images using Image J software.

|                     | P(HPMA)- <i>b</i> -<br>P(NIPAAm- <i>st</i> -<br>(EGMA-DOX)) | P(HPMA- <i>st</i> -<br>(EGMA-DOX))- <i>b</i> -<br>P(NIPAAm) | Free DOX |
|---------------------|-------------------------------------------------------------|-------------------------------------------------------------|----------|
| Cell area ratio (%) | 16.5                                                        | 16.2                                                        | 19.6     |

Average fluorescence

density per cell area

0.047

0.048

0.037

(/pixel)

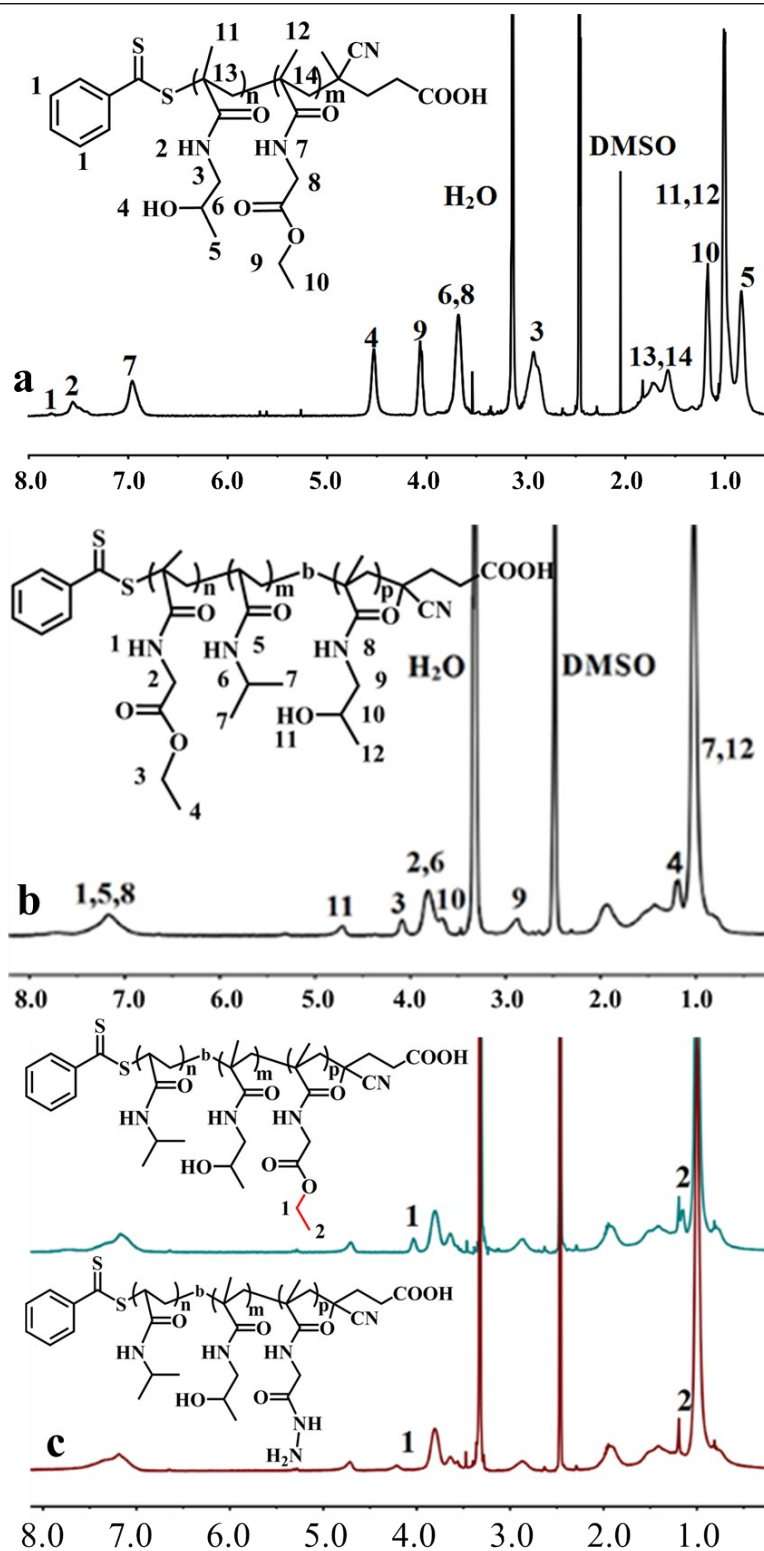

**Figure S1.** <sup>1</sup>H NMR spectra of (a) P(HPMA-*st*-EGMA), (b) P(HPMA-*st*-EGMA)-*b*-P(NIPAAm), and

(c) comparison of P(HPMA)-*b*-P(NIPAAm-*st*-EGMA) and P(HPMA-*st*-(EGMA-hydrazide))-*b*-P(NIPAAm) in  $d_6$ -DMSO.

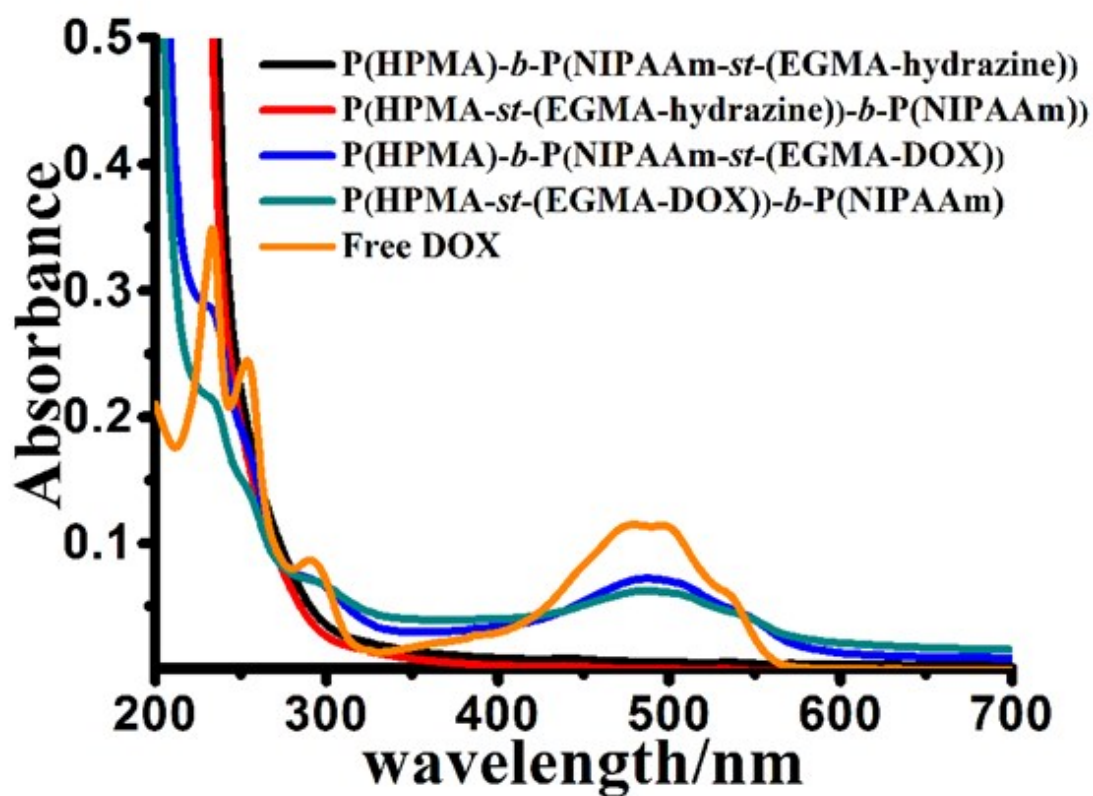

**Figure S2.** UV-Vis absorbance of P(HPMA)-*b*-(NIPAAm-*st*-(EGMA-hydrazine)), P(HPMA-*st*-(EGMA-hydrazine))-*b*-P(NIPAAm), P(HPMA)-*b*-(NIPAAm-*st*-(EGMA-DOX)), P(HPMA-*st*-(EGMA-DOX))-*b*-P(NIPAAm) at 0.033 mg/mL, and free DOX at 0.0006 mg/mL in water.

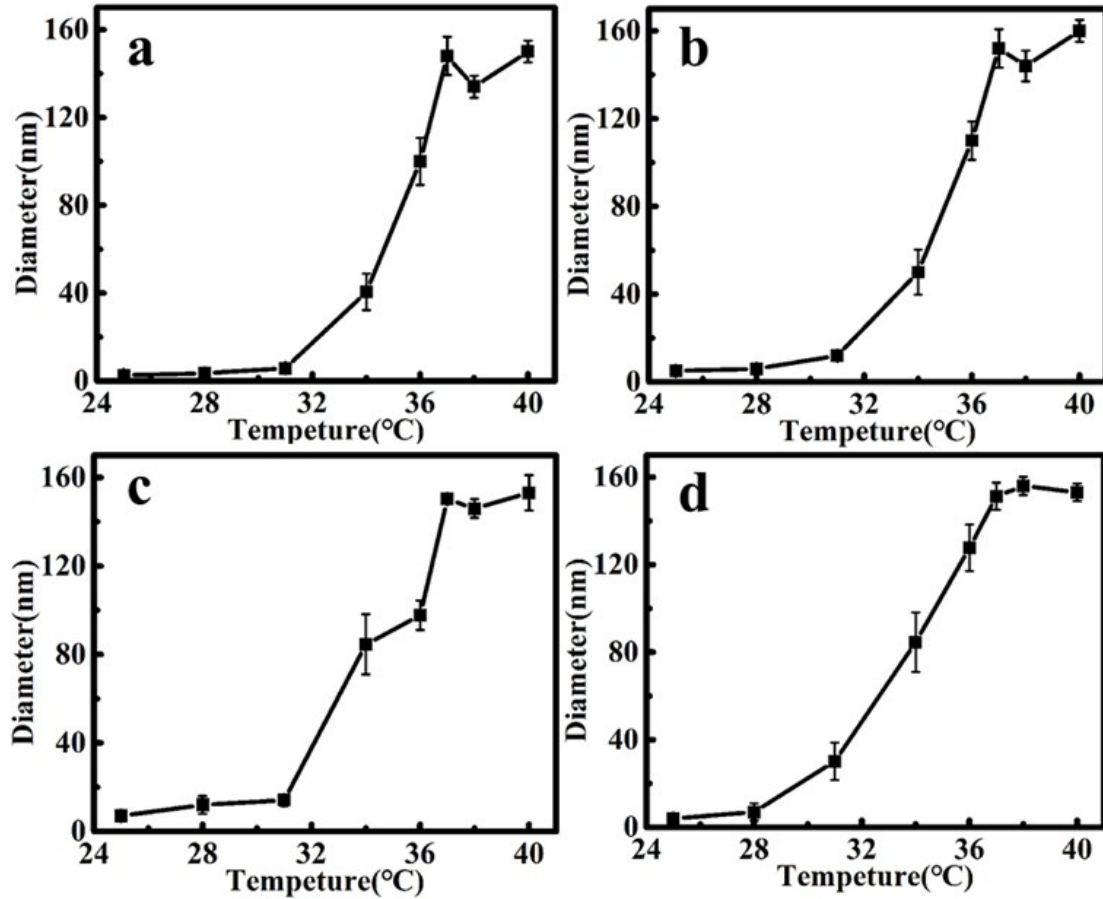

**Figure S3.** The first and second measurements of temperature-dependent size changes of P(HPMA)-*b*-P(NIPAAm-*st*-(EGMA-DOX)) (a & b) and P(HPMA-*st*-(EGMA-DOX))-*b*-P(NIPAAm) (c & d).

The polymer solution thermostatted at a high temperature was placed into a freezer set at -4°C for the second test immediately upon the completion of the first measurements.

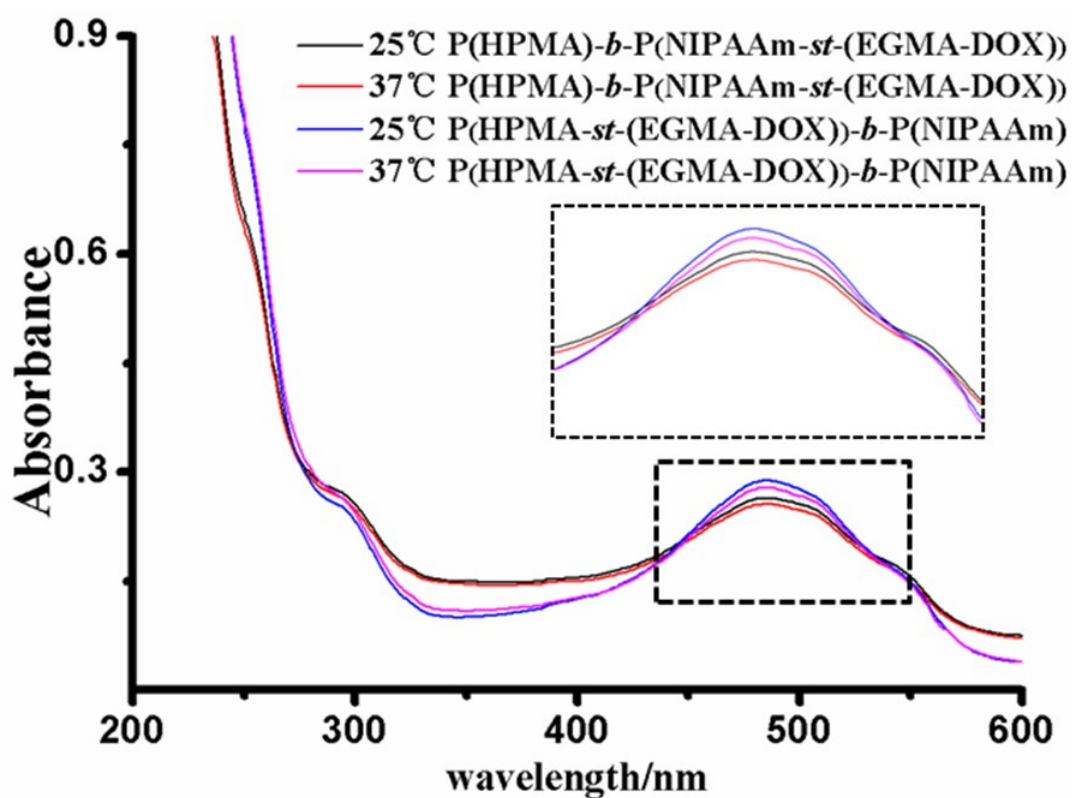

**Figure S4.** UV-Vis absorbance of P(HPMA)-*b*-(NIPAAm-*st*-(EGMA-DOX)) and P(HPMA-*st*-(EGMA-DOX))-*b*-P(NIPAAm) at different temperatures of 25 °C and 37 °C in water.

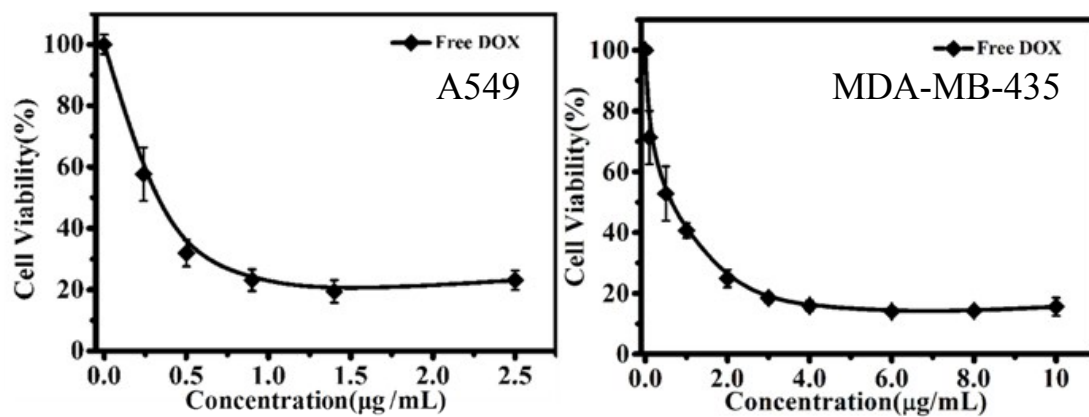

**Figure S5.** Cell viability of free DOX in A549 and MDA-MB-435 cells evaluated by MTT assay.

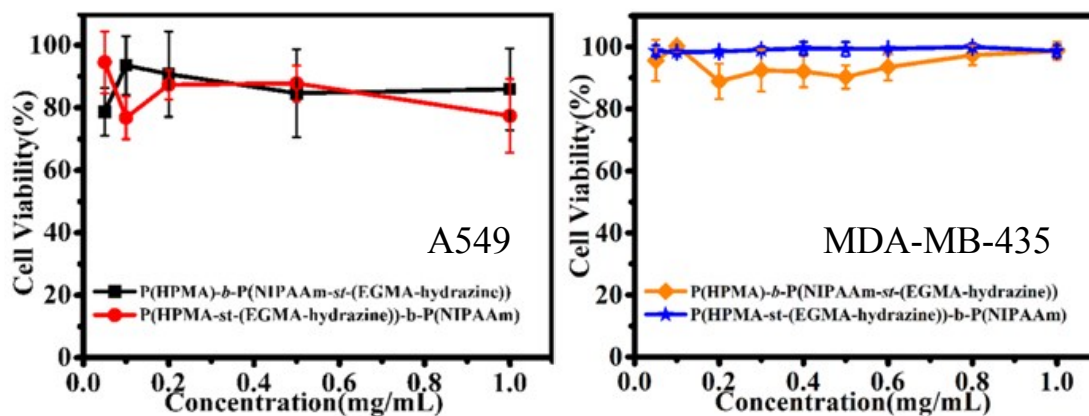

**Figure S6.** Cell viability of parent DHBCs of P(HPMA)-*b*-P(NIPAAm-*st*-(EGMA-hydrazine)) and P(HPMA-*st*-(EGMA-hydrazine))-*b*-P(NIPAAm) in A549 and MDA-MB-435 cells evaluated by MTT assay.
